# Supplementary material for: Cannabidiol Effectively Promoted Cell Death in Bladder Cancer and the Improved Intravesical Adhesion Drugs Delivery Strategy Could Be Better Used for Treatment
Source: MDPI journal article supplement (doi:10.3390/pharmaceutics13091415), 2021-09-07
Supplement: s1 [file s1]

# Supplementary Materials: Cannabidiol Effectively Promoted Cell Death in Bladder Cancer and the Improved Intravesical Adhesion Drugs Delivery Strategy Could Be Better Used for Treatment

Shanshan Chen, Changping Deng, Wenyun Zheng, Shihui Li, Yuping Liu, Tong Zhang, Chen Zhang, Yunhui Fu, Hui Miao, Fuzheng Ren and Xingyuan Ma

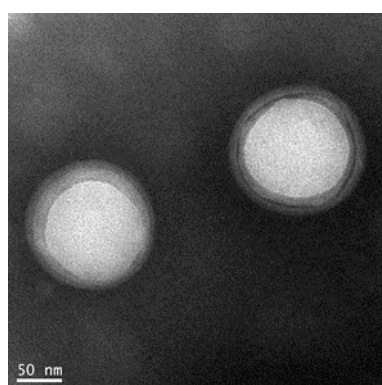

**Figure S1.** TEM images of blank PLGA NPs.

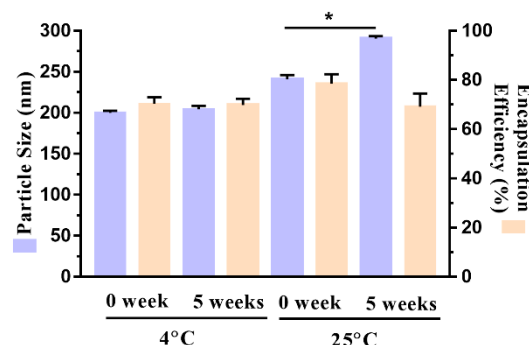

**Figure S2.** Changes in particle size and EE of CBD-loaded PLGA NPs at 4 °C and 25 °C for 2 weeks and 5 weeks.

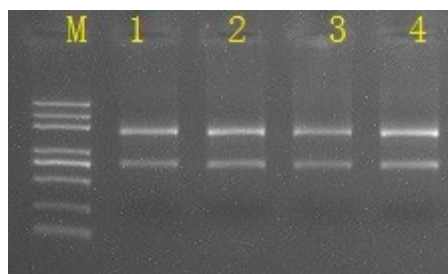

**Figure S3.** RNA extraction from CBD-treated T24 cells for transcriptome sequencing.

**Table S1.** The biological characteristics of Human T24, 5637, UM-UC-3, and SV-HUC-1 cell lines.

| Cell                                                                                                                                                                                                                                                                                                                                                                                                                            | T24                                              | UM-UC-3                                                                                                                         | 5637                                                                                                           | SV-HUC-1      |
|---------------------------------------------------------------------------------------------------------------------------------------------------------------------------------------------------------------------------------------------------------------------------------------------------------------------------------------------------------------------------------------------------------------------------------|--------------------------------------------------|---------------------------------------------------------------------------------------------------------------------------------|----------------------------------------------------------------------------------------------------------------|---------------|
| Organism                                                                                                                                                                                                                                                                                                                                                                                                                        | <i>Homo sapiens</i>                              |                                                                                                                                 |                                                                                                                |               |
| Morphology                                                                                                                                                                                                                                                                                                                                                                                                                      | epithelial                                       |                                                                                                                                 |                                                                                                                |               |
| Tissue                                                                                                                                                                                                                                                                                                                                                                                                                          | Urinary bladder                                  |                                                                                                                                 | Ureter; Uroepithelium                                                                                          |               |
| Growth properties                                                                                                                                                                                                                                                                                                                                                                                                               | Adherent                                         |                                                                                                                                 |                                                                                                                |               |
| Gender                                                                                                                                                                                                                                                                                                                                                                                                                          | Female                                           |                                                                                                                                 | Male                                                                                                           |               |
| Disease                                                                                                                                                                                                                                                                                                                                                                                                                         | Transitional Cell Carcinoma                      |                                                                                                                                 | Grade II Carcinoma                                                                                             | No            |
| Tumorigenic                                                                                                                                                                                                                                                                                                                                                                                                                     | Yes, in hamster cheek pouch;<br>No, in nude mice | Yes, Tumors developed within 21 days at 100% frequency (5/5) in nude mice inoculated subcutaneously with 10 <sup>7</sup> cells. | Yes, within 21 days at 100% frequency (5/5) in nude mice inoculated subcutaneously with 10 <sup>7</sup> cells. | No, nude mice |
| <div>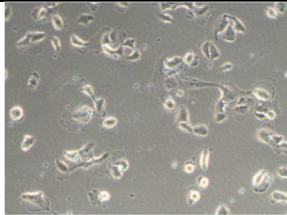</div> <div><div>T24</div><div>UMUC-3</div><div>5637</div><div>SV-HUC-1</div></div> |                                                  |                                                                                                                                 |                                                                                                                |               |

**Table S2.** Global transcriptome database sequencing data statistics table.

| Sample | Raw reads | Clean reads | Error rate (%) | Q20 (%) | Q30 (%) | GC content (%) |
|--------|-----------|-------------|----------------|---------|---------|----------------|
| 1      | 44539156  | 44342584    | 0.0274         | 96.95   | 92.02   | 51.60          |
| 2      | 52773994  | 52458958    | 0.0275         | 96.93   | 91.98   | 50.78          |
| 3      | 48162960  | 47939354    | 0.0277         | 96.82   | 91.78   | 51.10          |
| 4      | 55023994  | 54737156    | 0.0282         | 96.62   | 91.37   | 49.91          |

**Table S3.** The primers used for qPCR analysis.

| Primer    | Forward sequence (5'-3') | Reverse sequence (5'-3') |
|-----------|--------------------------|--------------------------|
| β-actin   | ATTGGCAATGAGCGGTTC       | GGATGCCACAGGACTCCAT      |
| Caspase 7 | GAATGGGTGTCCGCAACG       | TTGGCACAAGAGCAGTCGTT     |
| Bax       | TGCGTCCACCAAGAAGC        | TCCAGTTCGTCCCCGAT        |
| Bcl-2     | GCGGATTGACATTTCTGTG      | CATAAGGCAACGATCCCA       |
| Cyto-c    | GCTAAACACCAGGACGGAAC     | CCACTCCCAATCAGGCATGAAC   |
| MMP2      | ACCTGGATGCCGTCGTGGAC     | TGTGGCAGCACCAGGGCAGC     |
| MMP9      | CACTGTCCACCCCTCAGAGC     | GCCACTTGTCGGCGATAAGG     |

**Table S4.** The characterization of NPs.

| Nanoparticles       | CBD/PLGA NPs     | CS-CBD/PLGA NPs |
|---------------------|------------------|-----------------|
| Size (nm)           | 192.9 ± 2.41 nm  | 287.2 ± 0.9 nm  |
| Zeta potential (mV) | -6.27 ± 0.927 mV | 3.37 ± 0.158 mV |
| PDI                 | 0.041 ± 0.027    | 0.1335 ± 0.025  |
